# Supplementary material
Source: ML conference proceedings conference paper supplement (https://openreview.net/forum?id=1b7whO4SfY)

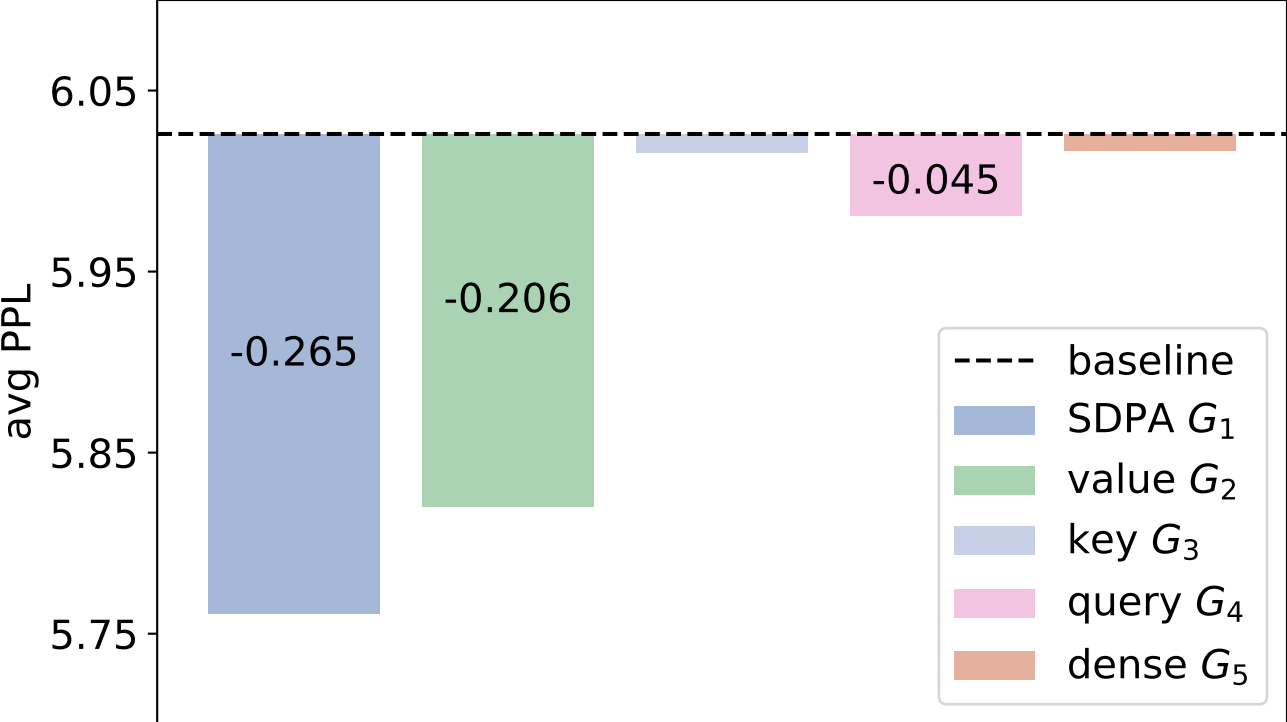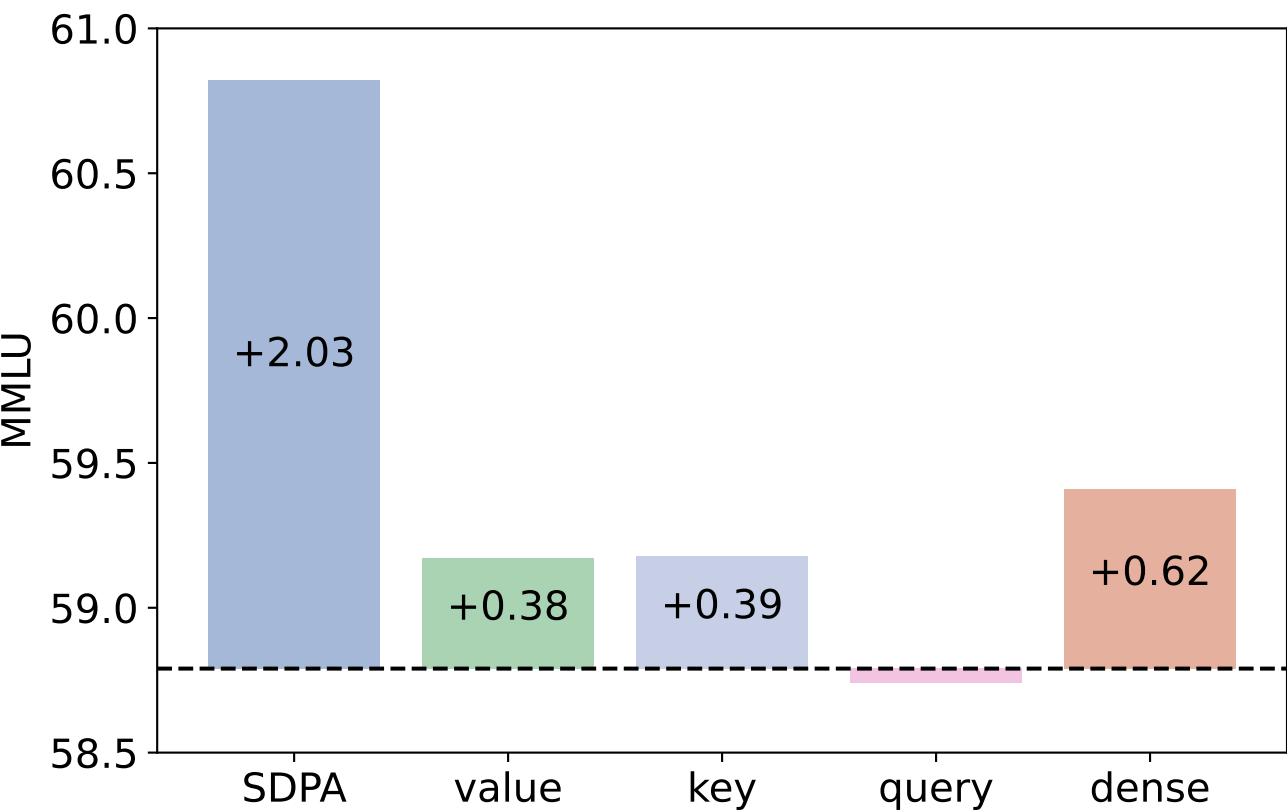

Supplement: supplementary_material [file benchmark_ppl_comparison.pdf › gated_attention_codes/figs/benchmark_ppl_comparison.pdf]

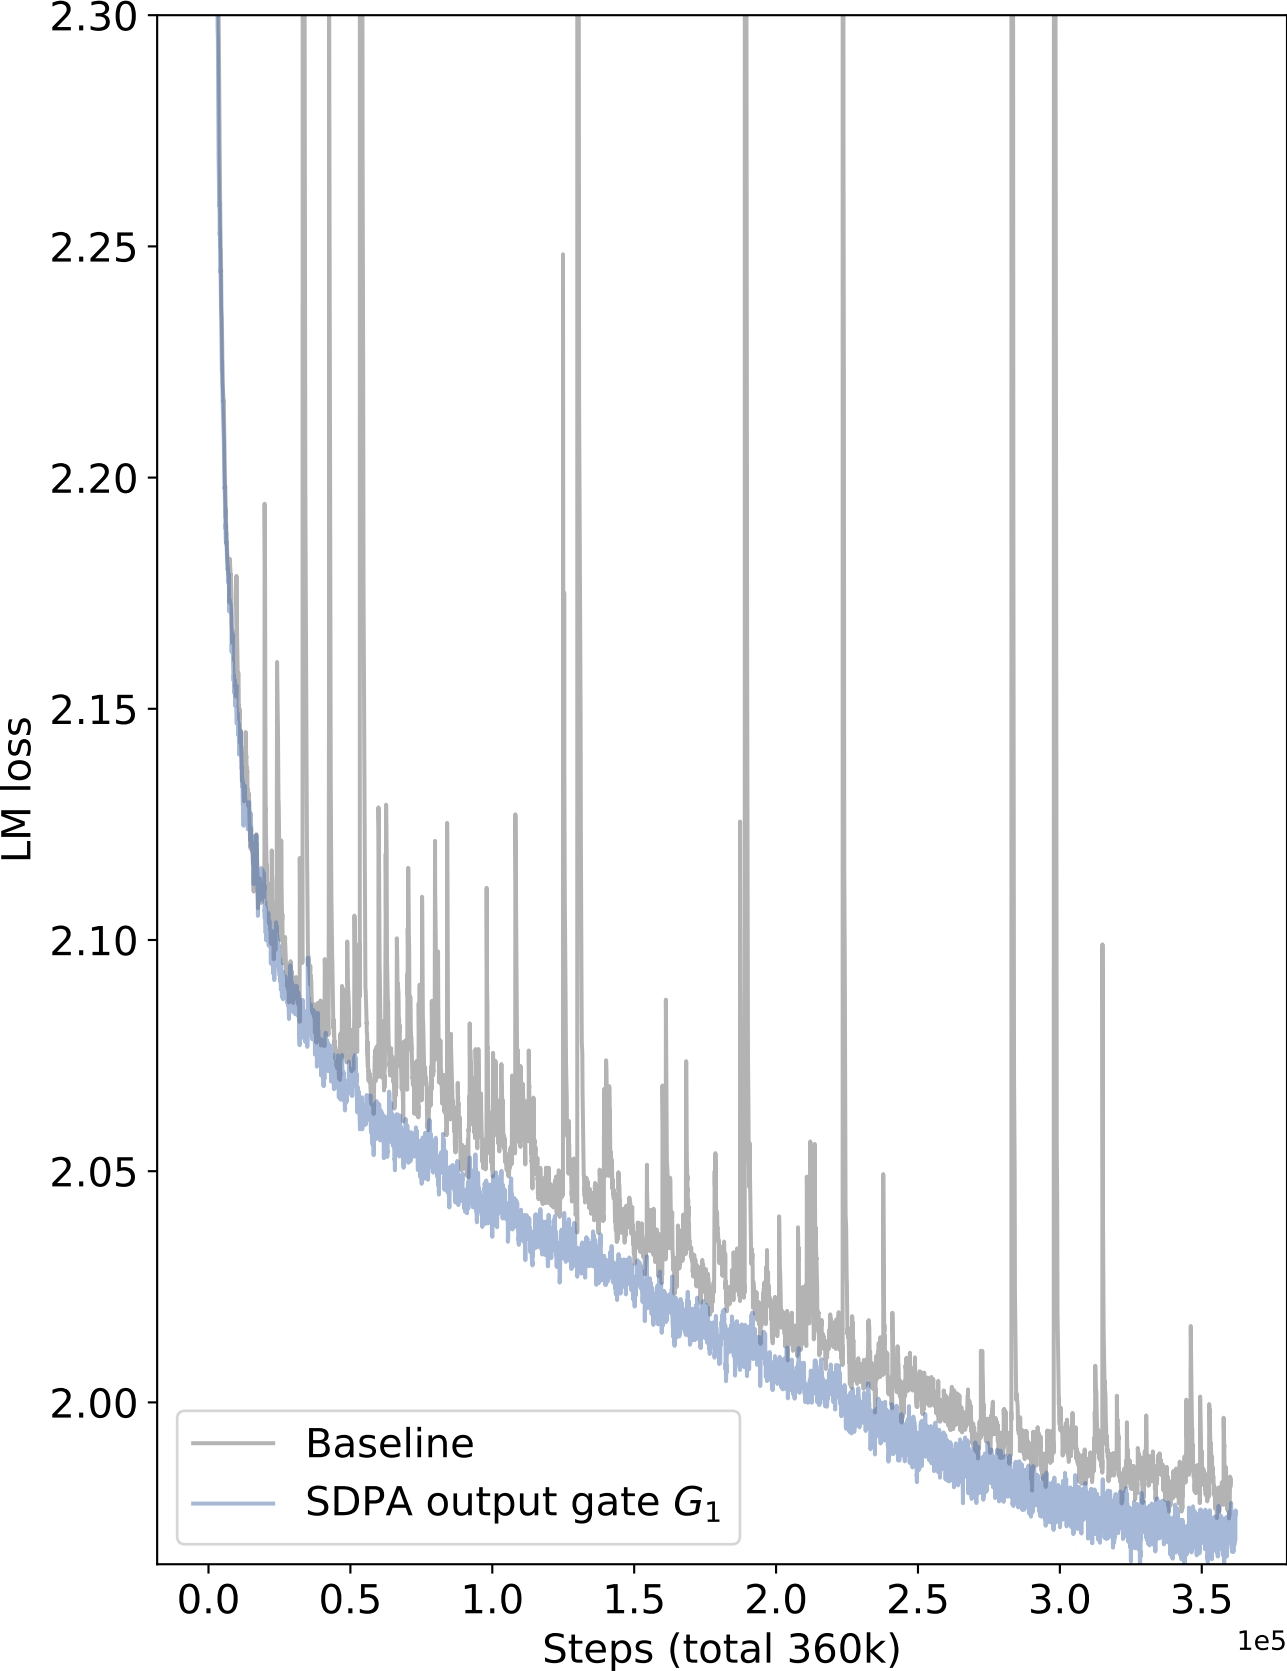

Supplement: supplementary_material [file lm_loss.pdf › gated_attention_codes/figs/lm_loss.pdf]
